# Supplementary material for: Novel shell-cross-linked micelles with detachable PEG corona for glutathione-mediated intracellular drug delivery
Source: Royal Society of Chemistry journal article supplement (doi:10.1039/c2sm27028e), 2012-11-02
Supplement: c2sm27028e.pdf [file c2sm27028e.pdf]

# Electronic supplementary information (ESI) for Soft Matter

# This journal is (c) The Royal Society of Chemistry 2012

**Novel Shell-Cross-Linked Micelles with Detachable PEG  
Corona for Glutathione-mediated Intracellular Drug  
Delivery**

Kang Wang, Yun Liu, Wen-Jie Yi, Cao Li, Yong-Yong Li, Ren-Xi Zhuo, Xian-Zheng  
Zhang\*

Key Laboratory of Biomedical Polymers of Ministry of Education & Department of  
Chemistry, Wuhan University, Wuhan 430072, P. R. China

\*Corresponding author. E-mail: xz-zhang@whu.edu.cn

### **Synthesis of carboxymethyl *m*PEG ( *m*PEG-COOH )**

An aqueous solution of KOH (40 wt%, 20 mL) was added to a solution of *m*PEG (5 g, 1 mM) in 30 mL of dimethylsulfoxide (DMSO). The solution was kept under magnetic stirring at room temperature for 30 min. Bromoacetic acid (1.38 g, 10 mM) was then added and the solution was kept at 70 °C for an additional 24 h. when the reaction was finished, a 38% HCl aqueous solution was added to neutralize the mixture. After successive removal of the resultant KCl and the solvents, the residue was dissolved in CH<sub>2</sub>Cl<sub>2</sub> and precipitated with excessive ethyl ether. The precipitate (*m*PEG-COOH) was collected and dried under vacuum overnight.

### **Synthesis of cystamine-modified *m*PEG(PEG-SS-NH<sub>2</sub>)**

*m*PEG-COOH (2.5 g, 0.5 mM), DCC (0.15 g, 0.75 mM) and NHS (0.86 g, 0.75 mM) was dissolved in 40 mL THF. The reaction mixture was stirred for 8 h and then added dropwise to a solution of cystamine (0.76 g, 5 mM) in 60 mL THF. The solution was allowed to stir for additional 24 hours at room temperature. The organic phase was concentrated and added dropwise to excessive ethyl ether to precipitate the product. The precipitate was collected by filtration and dried under vacuum overnight.

### **FT-IR measurements, <sup>1</sup>H NMR characterization and GPC measurements**

FT-IR spectra were recorded on an Avatar 360 spectrometer. <sup>1</sup>H NMR spectra were recorded on a Mercury VX-300 spectrometer at 300 Hz using CF<sub>3</sub>COOD-d<sub>6</sub> as the solvent. Number-average molecular weights (*M<sub>n</sub>*) of PEG-SS-PLys-PLeu were determined by gel permeation chromatographic (GPC) system equipped with Waters 2690D separations module, Waters 2410 refractive index detector. DMF was used as the eluent at a flow rate of 0.3 mLmin<sup>-1</sup>. Waters millennium module software was used to calculate molecular weight on the basis of a universal calibration curve generated by narrow molecular weight distribution polystyrene standards.

### **Fluorescence measurements, TEM, SEM measurements and size distribution measurements**

Fluorescence spectra were recorded on a Hitachi F2500 luminescence spectrometer. A drop of the micelle suspension containing 0.01% (w/v) phosphotungstic acid was placed on a copper grid with Formvar film and dried at 25 °C before being analyzed by JEM-100CX II instrument operating at an acceleration voltage of 100 kV. Scanning electron micrograph (SEM) was taken with a FEI-QUANTA 200 microscope. Malvern Nano-ZS ZEN3600 was used to determine the size distribution of the self-assembled micelles.

**Supplementary Table 1.** Feed ratio and molecular weight of synthesized PEG-SS-PLys(Z)-PLeu.

| Polymer | PEG/Lys-NCA/Leu-NCA<br>feed weight ratio | Reaction<br>time (h) | $M_n^a$ | $M_n^b$ |
|---------|------------------------------------------|----------------------|---------|---------|
| P1      | 5/3/4                                    | 72                   | 7000    | 9800    |
| P2      | 5/3/2                                    | 72                   | 6200    | 8500    |

<sup>a</sup> Calculated from GPC, <sup>b</sup> Calculated from <sup>1</sup>H NMR spectra.

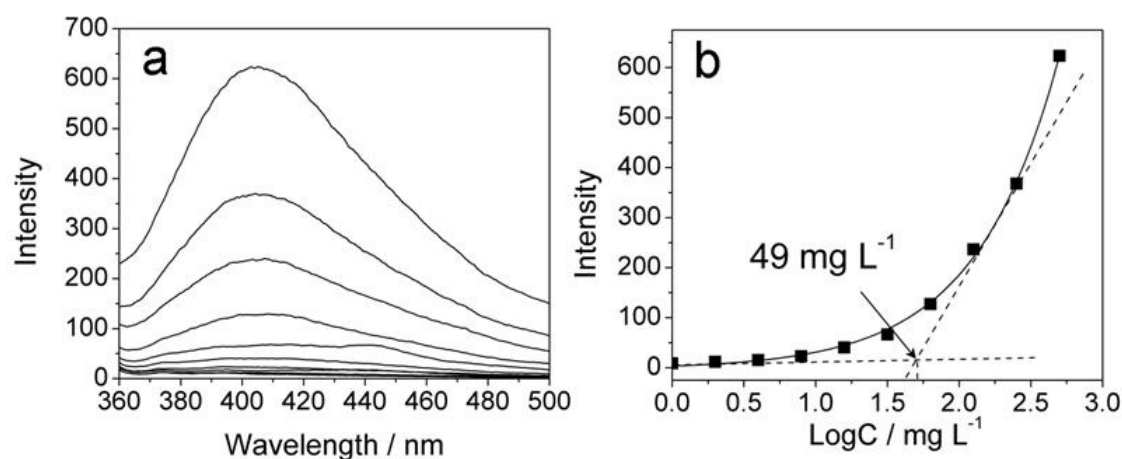

**Supplementary Figure 1.** (a) Emission spectra of pyrene with different concentrations of polymer 1; (b) Intensity of the emission spectra at 410 nm as a function of the logarithm of polymer concentration.
